# Supplementary material for: Quality of Life in Cohabitants of Patients with Hidradenitis Suppurativa: A Cross-sectional Study
Source: PubMed Central journal article supplement (PMC7459451; doi:10.3390/ijerph17166000), 2020-08-18
Supplement: ijerph-17-06000-s001.pdf [file ijerph-17-06000-s001.pdf]

**Table 1. sup.** Sociodemographic variables of patients and cohabitants.

| <b>Variables</b>              | <b>Patients (n=27)</b> | <b>Cohabitants (n=27)</b> | <b>p</b> |
|-------------------------------|------------------------|---------------------------|----------|
| Age, Years                    | 41.81 (SD 14.54)       | 45.18 (SD 14.34)          | 0.39     |
| Sex (female:male)             | 15:12                  | 17:10                     | 0.57     |
| Marital Status                |                        |                           |          |
| Single                        | 11.11% (3/27)          | 11.11% (3/27)             |          |
| Partner                       | 29.63% (8/27)          | 25.92% (7/27)             |          |
| Married                       | 59.25% (16/27)         | 51.85% (14/27)            | 0.52     |
| Divorced                      | 0.00% (0/27)           | 3.70% (1/27)              |          |
| Widows                        | 0.00% (0/27)           | 7.40% (2/27)              |          |
| Educational Level             |                        |                           |          |
| None                          | 3.70% (1/27)           | 7.40% (2/27)              |          |
| Primary or Equivalent         | 40.74% (11/27)         | 29.63% (8/27)             |          |
| Secondary or Equivalent       | 14.81% (4/27)          | 18.51% (5/27)             | 0.85     |
| Vocational Training           | 18.51% (5/27)          | 25.92% (7/27)             |          |
| University or Higher          | 22.22% (6/27)          | 18.51% (5/27)             |          |
| Occupation                    |                        |                           |          |
| Employee                      | 22.22% (6/27)          | 14.81% (4/27)             |          |
| Public Worker                 | 14.81% (4/27)          | 18.51% (5/27)             |          |
| Freelancer                    | 3.70% (1/27)           | 7.40% (2/27)              |          |
| Retiree                       | 14.81% (4/27)          | 22.22% (6/27)             | 0.91     |
| Unemployed                    | 29.63% (8/27)          | 22.22% (6/27)             |          |
| Student                       | 3.70% (1/27)           | 7.40% (2/27)              |          |
| Other                         | 11.11% (3/27)          | 7.40% (2/27)              |          |
| Relationship with the Patient |                        |                           |          |
| Partner                       | -                      | 66.66% (18/27)            | -        |
| Son/Daughter                  | -                      | 11.11% (3/27)             | -        |
| Father/Mother                 | -                      | 22.22% (6/27)             | -        |

Continuous variables are expressed as mean and standard deviation (SD). Qualitative variables are expressed as proportions. Wilcoxon-Mann-Whitney test was used for comparison between continuous variables. To compare qualitative variables, Chi-square test or Fisher's exact test when necessary was used.

**Table 2. sup.** Clinical variables of patients with hidradenitis suppurativa.

| <b>Variables</b>                          | <b>Patients (n=27)</b> |
|-------------------------------------------|------------------------|
| BMI                                       | 30.36 (SD 6.16)        |
| Hurley                                    |                        |
| I                                         | 29.63% (8/27)          |
| II                                        | 51.85% (14/27)         |
| III                                       | 18.51% (5/27)          |
| IHS4                                      | 8.14 (SD 8.03)         |
| Age of onset (years)                      | 27.40 (SD 13.51)       |
| Years of evolution                        | 14.40 (SD 14.17)       |
| Treatment                                 |                        |
| Topical                                   | 3.70% (1/27)           |
| Systemic Drugs (+/- topical)              | 44.44% (12/27)         |
| Biological Drugs (+/- topical)            | 11.11% (3/27)          |
| Systemic + Biological Drugs (+/- topical) | 18.51% (5/27)          |
| Surgery (+/- topical)                     | 14.81% (4/27)          |
| Surgery + Systemic Drugs (+/- topical)    | 7.40% (2/27)           |

BMI, body mass index; IHS4, International Hidradenitis Suppurativa Severity Score System. Continuous variables are expressed as mean and standard deviation (SD). Nominal variables are expressed as proportions.
